# Supplementary material for: FnCas9-based CRISPR diagnostic for rapid and accurate detection of major SARS-CoV-2 variants on a paper strip
Source: eLife. 2021 Jun 9;10:e67130. doi: 10.7554/eLife.67130 (PMC8289407; doi:10.7554/eLife.67130)
Supplement: Supplementary file 1. [file elife-67130-supp1.xlsx]

## Sheet: Sheet1
Chr	Coordinates	Nucleotides	Ref	alt	AACHANGE	GENE	Pangolin lineage	Status	Targetable by RAY
NC_045512	23063	A23063T	A	T	aa:S:N501Y	spike	B.1.351, P.1,P.3 and B.1.1.7	VOI	YES
NC_045512	23012	G23012A	G	A	aa:S:E484K	spike	B.1.351 and P.1, P.2 ,P.3,B.1.525,B.1.526	VOI,VOC	YES
NC_045512	23604	C23604A	C	A	aa:S:P681H	spike	B.1.1.7, P.3	VOI	YES
NC_045512	24506	T24506G	T	G	aa:S:S982A	spike	B.1.1.7	VOI	YES
NC_045512	22018	G22018T	G	T	aa:S:W152C	spike	B.1.427+ B.1.429	VOI	YES
NC_045512	23934	C23934T	C	T	aa:S:T791I	spike	B.1.526.1	VOI,VOC	YES
NC_045512	23593	G23593C	G	C	aa:S:Q677H	spike	B.1.525	VOI,VOC	YES
NC_045512	24224	T24224C	T	C	aa:S:F888L	spike	B.1.525	VOI,VOC	YES
NC_045512	23255	T23255C	T	C	aa:S:F565L	spike	P.2	VOI,VOC	YES
NC_045512	23012	G23012C	G	C	aa:S:E484Q	spike	B.1.617,B.1.617.1 ,B.1.617.3	VOI,VOC	YES
NC_045512	23604	C23604G	C	G	aa:S:P681R	spike	B.1.617.1,B.1.617.2,B.1.617.3	VOI,VOC	YES
NC_045512	22995	C22995A	C	A	aa:S:T478K	spike	B.1.617.2	VOI,VOC	YES
NC_045512	23709	C23709T	C	T	aa:S:T716I	spike	B.1.1.7	VOI	YES
NC_045512	24914	G24914C	G	C	aa:S:D1118H	spike	B.1.1.7	VOI	YES
NC_045512	25135	G25135C	G	C	aa:S:K1191N	spike	B.1.1.7	VOI	YES
NC_045512	23664	C23664T	C	T	aa:S:A701V	spike	B.1.351,B.1.526	VOI,VOC	YES
NC_045512	21801	A21801G	A	G	aa:S:D80G	spike	B.1.526.1	VOI,VOC	YES
NC_045512	21762	C21762T	C	T	aa:S:A67V	spike	B.1.525	VOI,VOC	YES
NC_045512	24775	A24775T	A	T	aa:S:Q1071H	spike	B.1.617.1	VOI,VOC	YES
NC_045512	23042	T23042C	T	C	aa:S:S494P	spike	B.1.1.7	VOI	No
NC_045512	23271	C23271A	C	A	aa:S:A570D	spike	B.1.1.7	VOI	No
NC_045512	23403	A23403G	A	G	aa:S:D614G	spike	B.1.351, B.1.1.7, P.1, P.2 ,B.1.427+B.1.429, B.1.526, B.1.526.1, B.1.525, B.1.617, B.1.617.1, B.1.617.2, B.1.617.3	VOI,VOC	No
NC_045512	21614	C21614T	C	T	aa:S:L18F	spike	P.1	VOI	No
NC_045512	21621	C21621A	C	A	aa:S:T20N	spike	P.1	VOI	No
NC_045512	21638	C21638T	C	T	aa:S:P26S	spike	P.1	VOI	No
NC_045512	21974	G21974T	G	T	aa:S:D138Y	spike	P.1	VOI	No
NC_045512	22132	G22132T	G	T	aa:S:R190S	spike	P.1	VOI	No
NC_045512	22812	A22812C	A	C	aa:S:K417T	spike	P.1	VOI	No
NC_045512	23525	C23525T	C	T	aa:S:H655Y	spike	P.1	VOI	No
NC_045512	24642	C24642T	C	T	aa:S:T1027I	spike	P.1	VOI	No
NC_045512	21801	T21801C	A	C	aa:S:D80A	spike	B.1.351	VOI	No
NC_045512	22206	A22206G	A	G	aa:S:D215G	spike	B.1.351	VOI	No
NC_045512	22813	G22813T	G	T	aa:S:K417N	spike	B.1.351	VOI	No
NC_045512	22917	T22917G	T	G	aa:S:L452R	spike	B.1.427+ B.1.429,B.1.617, B.1.617.1,B.1.617.2,B.1.617.3, B.1.526.1	VOI,VOC	No
NC_045512	21600	G21600T	G	T	aa:S:S13I	spike	B.1.427+ B.1.429	VOI	No
NC_045512	21575	C21575T	C	T	aa:S:L5F	spike	B.1.526	VOI,VOC	No
NC_045512	21846	C21846T	C	T	aa:S:T95I	spike	B.1.526,B.1.617.1	VOI,VOC	No
NC_045512	22320	A22320G	A	G	aa:S:D253G	spike	B.1.526	VOI,VOC	No
NC_045512	22992	G22992A	G	A	aa:S:S477N	spike	B.1.526	VOI,VOC	No
NC_045512	22032	T22032C	T	C	aa:S:F157S	spike	B.1.526.1	VOI,VOC	No
NC_045512	24410	G24410C	G	C	aa:S:D950H	spike	B.1.526.1	VOI,VOC	No
NC_045512	24138	C24138A	C	A	aa:S:T859N	spike	B.1.526.1	VOI,VOC	No
NC_045512	25088	G25088T	G	T	aa:S:V1176F	spike	P.2	VOI,VOC	No
NC_045512	22022	G22022A	G	A	aa:S:E154K	spike	B.1.617.1	VOI,VOC	No
NC_045512	21987	G21987A	G	A	aa:S:G142D	spike	B.1.617.1,B.1.617.2 ,B.1.617.3	VOI,VOC	No
NC_045512	21618	C21618G	C	G	aa:S:T19R	spike	B.1.617.2,B.1.617.3	VOI,VOC	No
NC_045512	22034	A22034G	A	G	aa:S:R158G	spike	B.1.617.2	VOI,VOC	No
NC_045512	24410	G24410A	G	A	aa:S:D950N	spike	B.1.617.2,B.1.617.3	VOI,VOC	No
