# Supplementary material for: FnCas9-based CRISPR diagnostic for rapid and accurate detection of major SARS-CoV-2 variants on a paper strip
Source: eLife. 2021 Jun 9;10:e67130. doi: 10.7554/eLife.67130 (PMC8289407; doi:10.7554/eLife.67130)
Supplement: Supplementary file 2. — The cutoff for SWT is 6.7 and SN501Y is 10.2. [file elife-67130-supp2.xlsx]

## Sheet: Sheet1
	qRT-PCR				Sequencing	SWT		SN501Y
S. No	ORF gene	E gene	IC	Result	Result	TOPSE-NTC	Result	TOPSE-NTC	Result
1	30.51	29.66	-	Positive	N501Y wt	25.8	Positive	3.4	Negative
2	32.9	33.45	34.57	Positive	N501Y wt	6.6	Positive	2.2	Negative
3	29.15	29.23	-	Positive	N501Y wt	11.2	Positive	0	Negative
4	17.47	17.84	-	Positive	N501Y wt	39	Positive	0.6	Negative
5	22.26	21.52	-	Positive	N501Y wt	37.2	Positive	9.3	Negative
6	24.53	24.79	44.38	Positive	N501Y wt	18.5	Positive	4.6	Negative
7	27.65	26.95	-	Positive	N501Y wt	16.1	Positive	5.8	Negative
8	29.99	29.8	36.67	Positive	N501Y wt	33.2	Positive	1.9	Negative
9	21.19	21.45	-	Positive	N501Y wt	23.2	Positive	1.2	Negative
10	23.35	23.01	-	Positive	N501Y wt	33.7	Positive	-0.8	Negative
11	25.67	25.78	-	Positive	N501Y wt	27.8	Positive	6.4	Negative
12	33.95	32.76	34.09	Positive	N501Y wt	19.5	Positive	2.7	Negative
13	22.56	22.74	-	Positive	N501Y wt	20.5	Positive	0.9	Negative
14	21.51	21.48	-	Positive	N501Y wt	32.5	Positive	-0.8	Negative
15	26.23	26.3	29.23	Positive	N501Y wt	28.9	Positive	5.8	Negative
16	27.93	28.1	-	Positive	N501Y wt	18.9	Positive	-0.9	Negative
17	20.21	20.76	38.35	Positive	N501Y wt	28.2	Positive	6.6	Negative
18	20.06	19.74	-	Positive	N501Y wt	34.9	Positive	3.4	Negative
19	22.13	22.68	37.3	Positive	N501Y wt	35.9	Positive	3.3	Negative
20	21.13	20.65	-	Positive	N501Y wt	38	Positive	3.5	Negative
21	26.5	25.95	-	Positive	N501Y wt	23.2	Positive	7.8	Negative
22	21.11	21.03	-	Positive	N501Y wt	42.8	Positive	3.5	Negative
23	24.24	23.92	-	Positive	N501Y wt	20.2	Positive	10.2	Negative
24	20.56	21.24	38.08	Positive	N501Y wt	28.5	Positive	6.7	Negative
25	22.22	22.12	-	Positive	N501Y wt	35.5	Positive	8.9	Negative
26	25.01	24.63	40.16	Positive	N501Y wt	12.5	Positive	7	Negative
27	25.31	26.13	36.6	Positive	N501Y wt	15	Positive	6.2	Negative
28	27.56	26.66	-	Positive	N501Y wt	35.3	Positive	6.6	Negative
29	25.2	24.34	-	Positive	N501Y wt	32.9	Positive	7.5	Negative
30	28.34	28.27	32.96	Positive	N501Y wt	37.1	Positive	1.4	Negative
31	24.13	23.98	43.21	Positive	N501Y wt	14.4	Positive	4.1	Negative
32	27.14	27.37	35.17	Positive	N501Y wt	12.2	Positive	5.7	Negative
33	18.36	19.26	42.57	Positive	N501Y wt	57.8	Positive	2.4	Negative
34	19.8	20.23	43.36	Positive	N501Y wt	63.1	Positive	3	Negative
35	28.04	26.97	-	Positive	N501Y wt	46.3	Positive	4.5	Negative
36	25.29	23.79	-	Positive	N501Y wt	29.3	Positive	10.8	Positive
37	26.25	26.38	-	Positive	N501Y wt	47.3	Positive	3.4	Negative
	qRT-PCR				Sequencing	SWT		SN501Y
S. No	ORF gene	E gene	IC	Result	Result	TOPSE-NTC	Result	TOPSE-NTC	Result
1	31.69	30.67	31.16	Positive	N501Y mut	58.3	Positive	28.6	Positive
2	24.77	24.41	34.89	Positive	N501Y mut	61.8	Positive	27.8	Positive
3	21.12	20.4	44.01	Positive	N501Y mut	30.5	Positive	31	Positive
4	20.05	19.5	-	Positive	N501Y mut	31.4	Positive	41.4	Positive
5	23.8	23.85	-	Positive	N501Y mut	45.1	Positive	26.8	Positive
6	21.98	18.81	-	Positive	N501Y mut	42.6	Positive	31.2	Positive
7	29.16	28.83	27.92	Positive	N501Y mut	48.5	Positive	18.1	Positive
8	24.69	23.99	-	Positive	N501Y mut	52.7	Positive	0.8	Negative
9	22.99	22.12	-	Positive	N501Y mut	35.5	Positive	22.7	Positive
10	25.71	4.19	5.88	Positive	N501Y mut	32.4	Positive	27.8	Positive
11	29.01	28.67	33.44	Positive	N501Y mut	21.1	Positive	9.2	Negative
12	24.13	23.91	36.14	Positive	N501Y mut	23.5	Positive	23.1	Positive
13	24.55	23.75	35.66	Positive	N501Y mut	31.8	Positive	15.1	Positive
14	20.15	20.56	-	Positive	N501Y mut	9.4	Positive	27.5	Positive
15	24.1	24.42	-	Positive	N501Y mut	11.3	Positive	7.3	Negative
16	28.07	27.64	-	Positive	N501Y mut	9.3	Positive	16	Positive
17	21.5	22.31	-	Positive	N501Y mut	9.9	Positive	25.7	Positive
18	19.09	19.23	-	Positive	N501Y mut	12.3	Positive	18	Positive
19	27.02	26.64	38.5	Positive	N501Y mut	11.7	Positive	15.3	Positive
20	19.63	20.17	-	Positive	N501Y mut	13.3	Positive	24.5	Positive
21	18.16	18.58	-	Positive	N501Y mut	25.2	Positive	28.2	Positive
22	22.08	23.22	32.67	Positive	N501Y mut	15.5	Positive	22.6	Positive
