# Supplementary material for: FnCas9-based CRISPR diagnostic for rapid and accurate detection of major SARS-CoV-2 variants on a paper strip
Source: eLife. 2021 Jun 9;10:e67130. doi: 10.7554/eLife.67130 (PMC8289407; doi:10.7554/eLife.67130)
Supplement: Supplementary file 3. [file elife-67130-supp3.xlsx]

## Sheet: RAY- without RNA extraction
PRODUCT NAME	UNIT PRICE (INR)	Price per reaction	RAY
cDNA synthesis
Reverse transcription kit	80000	100
PCR Reagents
dNTPs (100mM) mix	20000	3
DMSO	6000	0.0048
Taq DNA polymerase recombinant	30000	6
Forward primer Covid T1 PCR-Biotin* (2 genes - N501Y/S)	6000 per 20nmol	4
Reverse primer Covid T1 PCR-Biotin* (2 genes- N501Y/S)	6000 per 20nmol	4
Nuclease free water	17000	0.4
IVT reagents
NucAway™ Spin Columns	17000	0.6
T7 Megascript kit	125000	12.5
TracrRNA FAM labelled (two)	32000 per 4nmol	10
Paper Strip
Milenia Genline HybriDetect (Make: Milenia Biotec)	20000	340
dfnCas9		15
	Total	495.505	RUPEE Price
		7.07864	DOLLAR Price
