# Supplementary material for: FnCas9-based CRISPR diagnostic for rapid and accurate detection of major SARS-CoV-2 variants on a paper strip
Source: eLife. 2021 Jun 9;10:e67130. doi: 10.7554/eLife.67130 (PMC8289407; doi:10.7554/eLife.67130)
Supplement: Supplementary file 4. [file elife-67130-supp4.xlsx]

## Sheet: Sheet1
Sl. No.	Primer	Sequence	Discription	Used in Fig.
1	HBB_2&6sgRNA_FP	TAATACGACTCACTATAGTAACGGCAGACTTATCCACGTTTCAGTTGCGCCGAAAGGCGCTCTGTAATCATT	crRNA oligo for IVT with 2 mismatches w.r.t. HBB locus WT sgRNA at 2nd & 6th position	1.(A)
2	HBB_2&6sgRNA_RP	CAGACGTGTCAAACAGAGGTCCGTTCAAAATACTTTTAAATGATTACAGAGCGCCTTTCGGCGCAACTGAAAC	crRNA oligo for IVT with 2 mismatches w.r.t. HBB locus WT sgRNA at 2nd & 6th position	1.(A)
3	HBB_16&19sgRNA_FP	TAATACGACTCACTATAGGAAAGGCAGACTTCTCCTCGTTTCAGTTGCGCCGAAAGGCGCTCTGTAATCATT	crRNA oligo for IVT with 2 mismatches w.r.t. HBB locus WT sgRNA at 16th & 19th position	1.(A)
4	HBB_16&19sgRNA_RP	CAGACGTGTCAAACAGAGGTCCGTTCAAAATACTTTTAAATGATTACAGAGCGCCTTTCGGCGCAACTGAAAC	crRNA oligo for IVT with 2 mismatches w.r.t. HBB locus WT sgRNA at 16th & 19th position	1.(A)
5	HBB_228bp_RP	TCTCCACATGCCCAGTTTCT	PCR primer for 228bp HBB amplicon	1.(A)
6	HBB_228bp_FP	AGTCAGGGCAGAGCCATCTA	PCR primer for 228bp HBB amplicon	1.(A)
7	N501Y_Fn_Cr2&6T_FP:	TAATACGACTCACTATAGTATGGTTTCCAACCTACTTAGTTTCAGTTGCTGAATTAT	SARS_CoV2_N501Y crRNA oligo for IVT	All N501Y LFA
8	N501Y_Fn_Cr2&6T_RP	ATAATTCAGCAACTGAAACTAAGTAGGTTGGAAACCATACTATAGTGAGTCGTATTA	SARS_CoV2_N501Y crRNA oligo for IVT	All N501Y LFA
9	T716I_Fn_Cr2A&6_FP	TAATACGACTCACTATAGACACTAATAGTAAATTTTATGTTTCAGTTGCTGAATTAT	SARS_CoV2_T716I crRNA oligo for IVT	2.(A), 4.(G)
10	T716I_Fn_Cr2A&6_RP	ATAATTCAGCAACTGAAACATAAAATTTACTATTAGTGTCTATAGTGAGTCGTATTA	SARS_CoV2_T716I crRNA oligo for IVT	2.(A), 4.(G)
11	S_Gene_crRNA3_FP	TAATACGACTCACTATAGACATTACACCATGTTCTTTGTTTCAGTTGCTGAATTAT	SARS_CoV2_S_Gene crRNA oligo for IVT	All S gene LFA
12	S_Gene_crRNA3_RP	ATAATTCAGCAACTGAAACAAAGAACATGGTGTAATGTCTATAGTGAGTCGTATTA	SARS_CoV2_S_Gene crRNA oligo for IVT	All S gene LFA
13	E484K_Fn_Cr2A&6_FP	TAATACGACTCACTATAGACACCTTGTAATGGAGTTAAGTTTCAGTTGCTGAATTAT	SARS_CoV2_E484K crRNA oligo for IVT	4.(G), 4.(H)
14	E484K_Fn_Cr2A&6_RP	ATAATTCAGCAACTGAAACTTAACTCCATTACAAGGTGTCTATAGTGAGTCGTATTA	SARS_CoV2_E484K crRNA oligo for IVT	4.(G), 4.(H)
15	CoV2_S_N501Y_FP	CTATCAGGCCGGTAGCACAC	IVC target amplicon for N501Y_Fn_Cr2&6T (237bp)	2.(A)
16	CoV2_S_N501Y_RP	ACACCTGTGCCTGTTAAACC	IVC target amplicon for N501Y_Fn_Cr2&6T (237bp)	2.(A)
17	CoV2_S_T716I_FP	TGCTGCATTCAGTTGAATCA	IVC target amplicon for T716I_Fn_Cr2A&6 (299bp)	2.(A)
18	CoV2_S_T716I_RP	AGGGGCTGAACATGTCAACA	IVC target amplicon for T716I_Fn_Cr2A&6 (299bp)	2.(A)
19	CoV2_S_T716I_FP(524bp)	(Btn)CCGTGATCCACAGACACTTG	5' Biotinylated RT-PCR primer for T716I_Fn_Cr2A&6 target (524bp amplicon)	4.(G)
20	CoV2_S_T716I_RP(524bp)	TGCTGCATTCAGTTGAATCA	RT-PCR primer for T716I_Fn_Cr2A&6 target (524bp amplicon)	4.(G)
21	CoV2_S_N501Y_FP(541bp)	(Btn)CCGCATCATTTTCCACTTTT	5' Biotinylated RT-PCR primer for N501Y_Fn_Cr2&6T target (541bp amplicon)	3.(A)
22	CoV2_S_N501Y_RP(541bp)	ACACCTGTGCCTGTTAAACC	RT-PCR primer for N501Y_Fn_Cr2&6T target (541bp amplicon)	3.(A)
23	CoV2_S_N501Y_FP(469bp)	(Btn)CCGCATCATTTTCCACTTTT	5' Biotinylated RT-PCR primer for N501Y_Fn_Cr2&6T target (469bp amplicon)	3.(A)
24	CoV2_S_N501Y_RP(469bp)	GGTCCACAAACAGTTGCTGG	RT-PCR primer for N501Y_Fn_Cr2&6T target (469bp amplicon)	3.(A)
25	CoV2_S_N501Y_FP(789bp)	AAATCGCTCCAGGGCAAACT	5' Biotinylated RT-PCR primer for N501Y_Fn_Cr2&6T target (789bp amplicon)	3.(A)
26	CoV2_S_N501Y_RP(789bp)	(Btn)CGCATATACCTGCACCAATG	RT-PCR primer for N501Y_Fn_Cr2&6T target (789bp amplicon)	3.(A)
27	CoV2_S_N501Y_FP(580bp)	CCTTGTAATGGTGTTGAAGGTT	RT-PCR primer for N501Y_Fn_Cr2&6T target (580bp amplicon)	3.(A), 3.(B), 3.(C), 4.(A)
28	CoV2_S_N501Y_RP(580bp)	(Btn)CGCATATACCTGCACCAATG	5' Biotinylated RT-PCR primer for N501Y_Fn_Cr2&6T target (580bp amplicon)	3.(A), 3.(B), 3.(C), 4.(A)
29	CoV2_S_N501Y_FP(580bp)	(Btn)CCTTGTAATGGTGTTGAAGGTT	5' Biotinylated RT-PCR primer for N501Y_Fn_Cr2&6T target (580bp amplicon)	4.(A)
30	CoV2_S_N501Y_RP(580bp)	(Btn)CGCATATACCTGCACCAATG	5' Biotinylated RT-PCR primer for N501Y_Fn_Cr2&6T target (580bp amplicon)	4.(A)
31	CoV2_S_N501Y_FP(454bp)	(Btn)CTATCAGGCCGGTAGCACAC	5' Biotinylated RT-PCR primer for N501Y_Fn_Cr2&6T target (454bp amplicon)	4.(B)
32	CoV2_S_N501Y_RP(454bp)	(Btn)AGCAACAGGGACTTCTGTGC	5' Biotinylated RT-PCR primer for N501Y_Fn_Cr2&6T target (454bp amplicon)	4.(B)
33	CoV2_S_N501Y_FP(237bp)	(Btn)CTATCAGGCCGGTAGCACAC	5' Biotinylated RT-PCR primer for N501Y_Fn_Cr2&6T target (237bp amplicon)	4.(B)
34	CoV2_S_N501Y_RP(237bp)	(Btn)ACACCTGTGCCTGTTAAACC	5' Biotinylated RT-PCR primer for N501Y_Fn_Cr2&6T target (237bp amplicon)	4.(B)
35	CoV2_S_N501Y_FP(149bp)	(Btn)CTATCAGGCCGGTAGCACAC	5' Biotinylated RT-PCR primer for N501Y_Fn_Cr2&6T target (149bp amplicon)	4.(B), 4.(E), 4.(H)
36	CoV2_S_N501Y_RP(149bp)	(Btn)CTGGTGCATGTAGAAGTTCAAA	5' Biotinylated RT-PCR primer for N501Y_Fn_Cr2&6T target (149bp amplicon)	4.(B), 4.(E), 4.(H)
37	CoV2_S_E484K_FP(454bp)	(Btn)CTATCAGGCCGGTAGCACAC	5' Biotinylated RT-PCR primer for E484K_Fn_Cr2A&6 target (454bp amplicon)	4.(G), 4.(H)
38	CoV2_S_E484K_RP(454bp)	(Btn)AGCAACAGGGACTTCTGTGC	5' Biotinylated RT-PCR primer for E484K_Fn_Cr2A&6 target (454bp amplicon)	4.(G), 4.(H)
39	CoV2_Sgene_FP (287bp)	(Btn)CCGTGATCCACAGACACTTG	5' Biotinylated RT-PCR primer for S_Gene_crRNA3 target (287bp amplicon)	4.(C), 4.(F)
40	CoV2_Sgene_RP (287bp)	(Btn)CGCATATACCTGCACCAATG	5' Biotinylated RT-PCR primer for S_Gene_crRNA3 target (287bp amplicon)	4.(C), 4.(F)
41	N501Y_Fn_synCr2&6	U*A*UGGUUUCCAACCUACUUAGUUUCAGUUGCUGAAUU*A*U	Synthetic crRNA Phosphorothioate end protected (*)	4.(I)
42	FnCas9_Syn_tracrRNA	G*U*AAUUAAUGCUCUGUAAUCAUUUAAAAGUAUUUUGAACGGACCUCUGUUUGACACGUC*U*U	Synthetic tracrRNA Phosphorothioate end protected (*) and FAM at 3'	All LFA Expt.
				*LFA - Lateral Flow Assay
